# Supplementary material
Source: PubMed Central journal article supplement (PMC3762500)
Supplement: NIHMS503851-supplement-supplement_1.pdf [file NIHMS503851-supplement-supplement_1.pdf]

## Supplemental Data

### “MIATA”—Minimal Information about T Cell Assays

S. Janetzki, C.M. Britten, M. Kalos, H.I. Levitsky, H.T. Maecker, C.J.M. Melief, L.J. Old, P. Romero, A. Hoos, and M.M. Davis

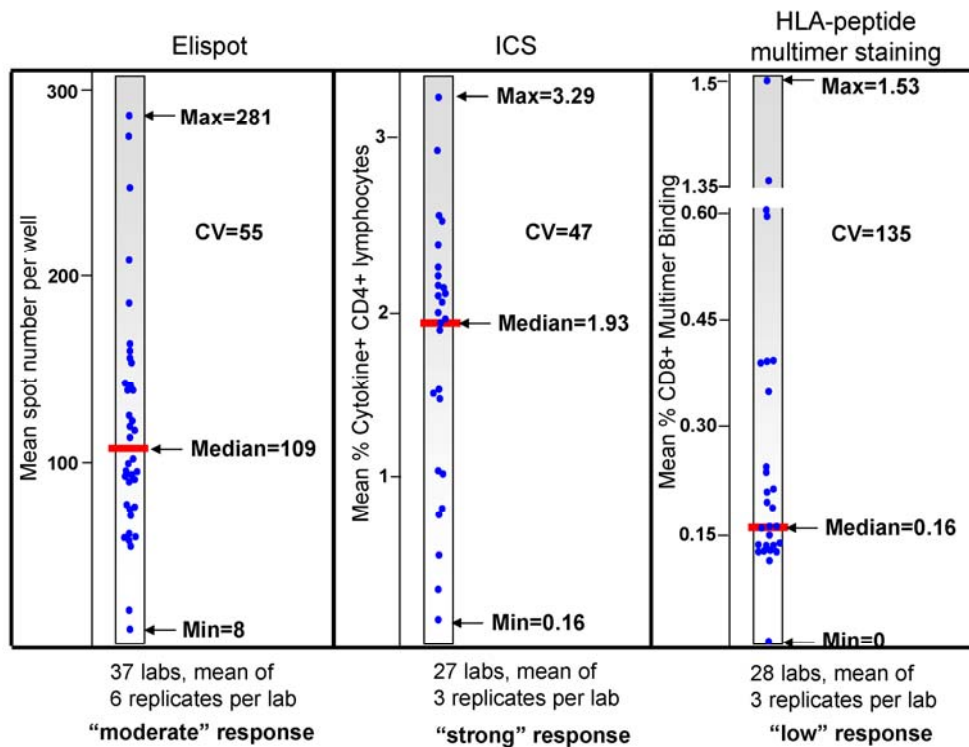

Figure S1. Interlaboratory Variability in Immune Response Measurements

Data were obtained in Proficiency Panels conducted by the Cancer Vaccine Consortium. ELISPOT and ICS data represent the CMVpp65 peptide pool response in donors representing a moderate (ELISPOT) or a high responder (ICS). The HLA-peptide multimer staining data were obtained from a weak responder to the HLA-A2-restricted Influenza M1<sub>58-66</sub> peptide. The variability shown for the three response levels is representative for all three assays. Comparisons across assays cannot be done because of the use of different donors with different response levels. However, the data show persistently high CVs in all three types of assays, compared to CVs seen in intralaboratory reproducibility studies (Maecker et al., 2008).

### Supplemental References

Maecker, H.T., Hassler, J., Payne, J.K., Summers, A., Comatas, K., Ghanayem, M., Morse, M.A., Clay, T.M., Lysterly, H.K., Bhatia, S., et al. (2008). *BMC Immunol.* 9, 9.
